# Supplementary material for: Genomic architecture of adaptive color pattern divergence and convergence in Heliconius butterflies
Source: HighWire-hosted journal article supplement (doi:10.1101/gr.150615.112), 2013-05-14

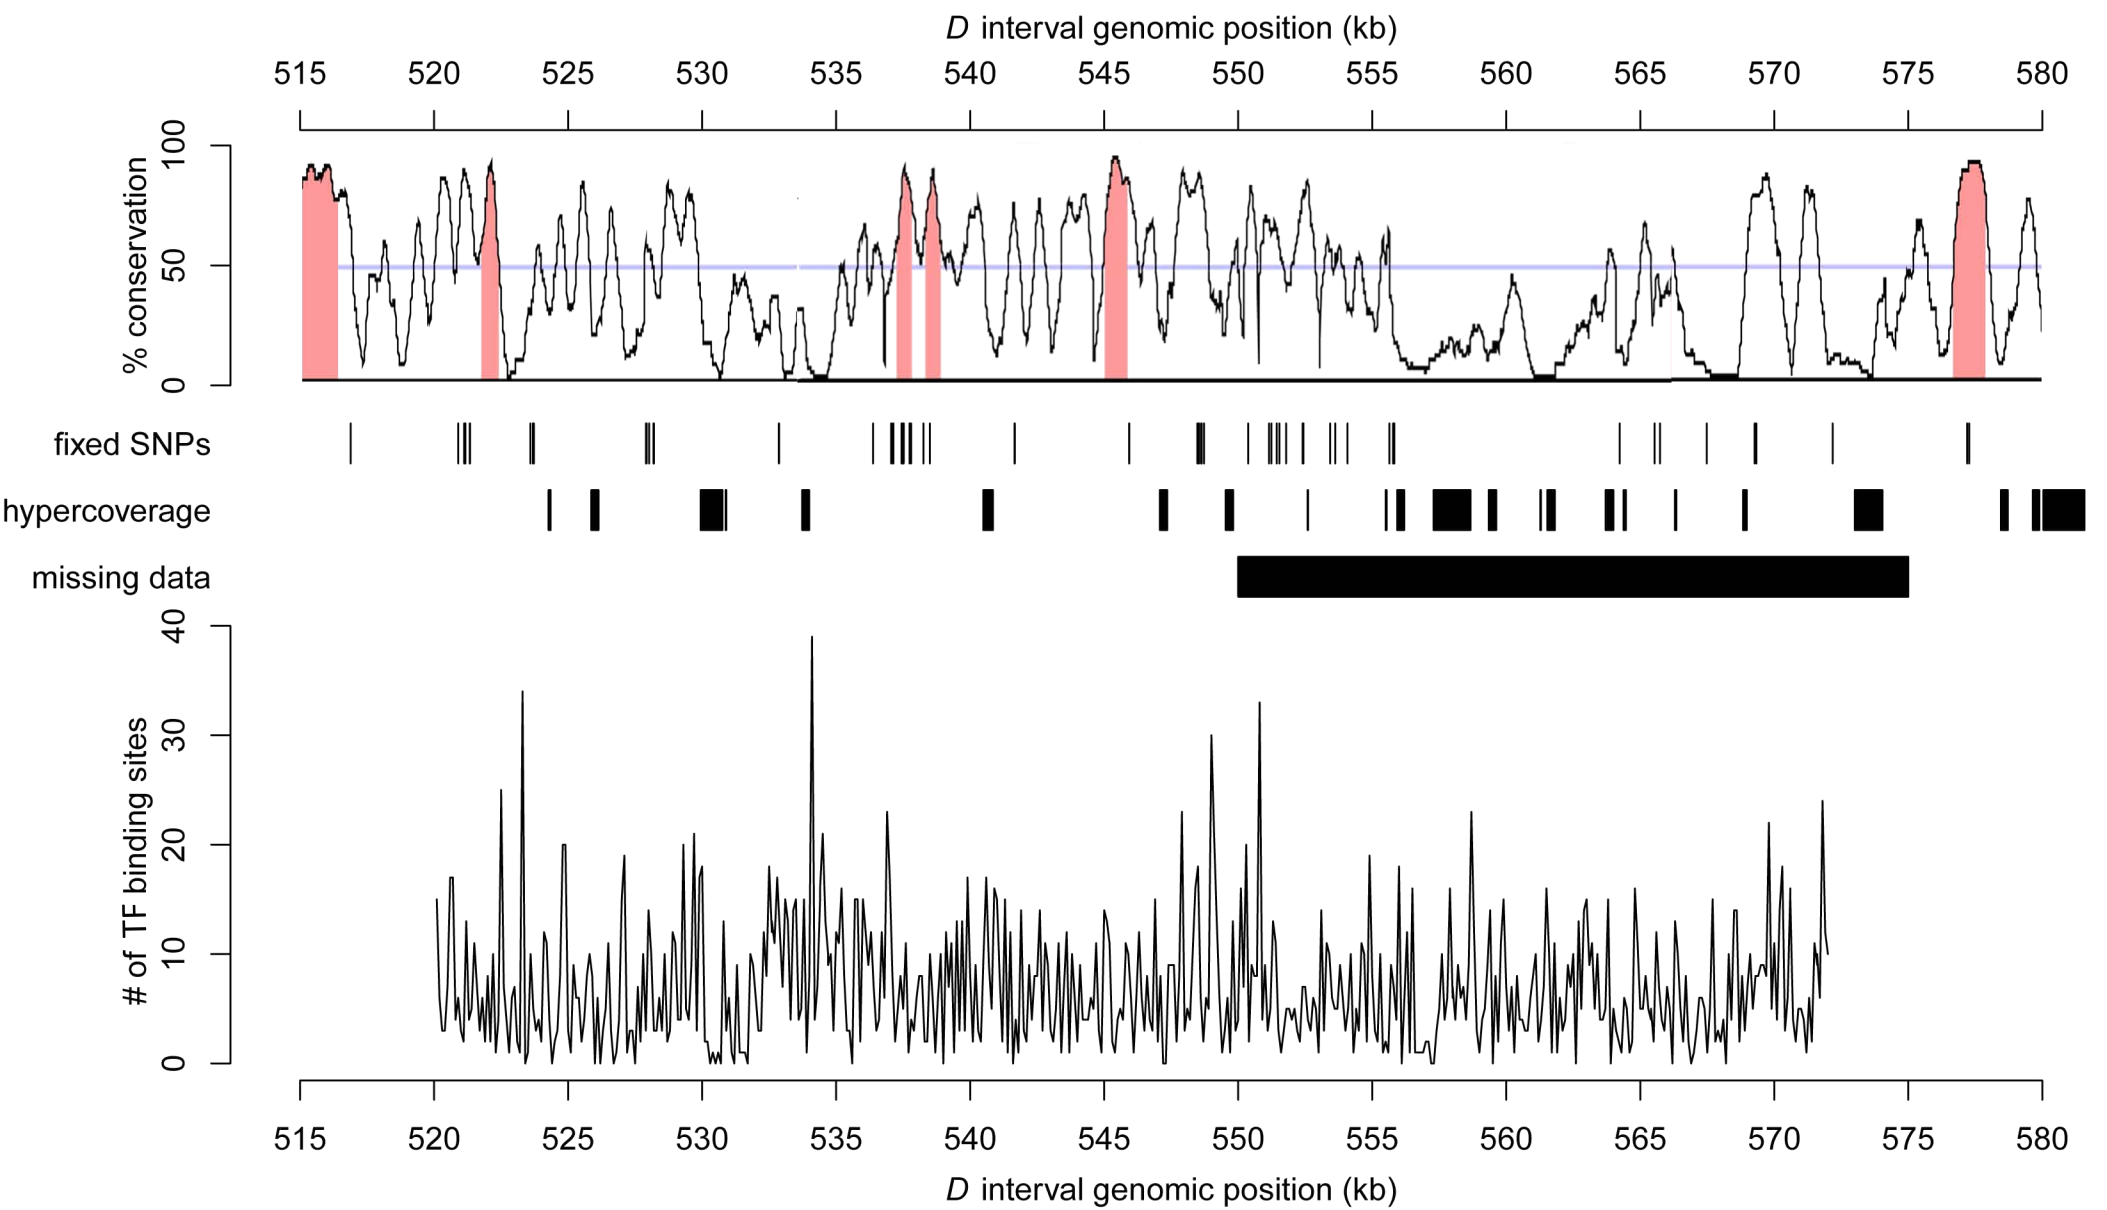

Supplement: Supplemental_FigS2.pdf [file Supplemental_FigS2.pdf]
