# Supplementary material for: Genomic architecture of adaptive color pattern divergence and convergence in Heliconius butterflies
Source: HighWire-hosted journal article supplement (doi:10.1101/gr.150615.112), 2013-05-14

A) D-interval: 515-580KB

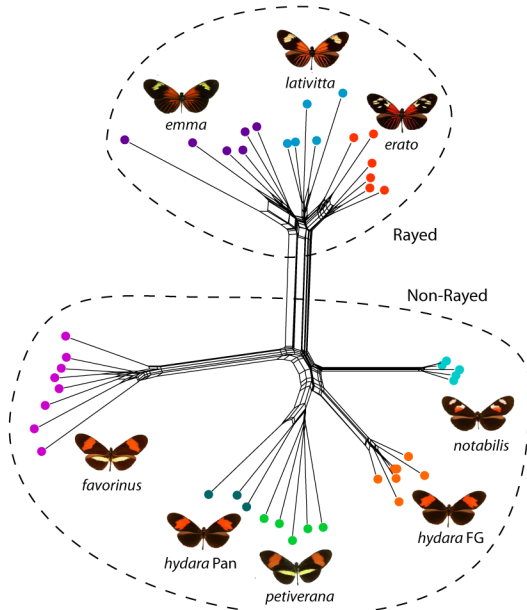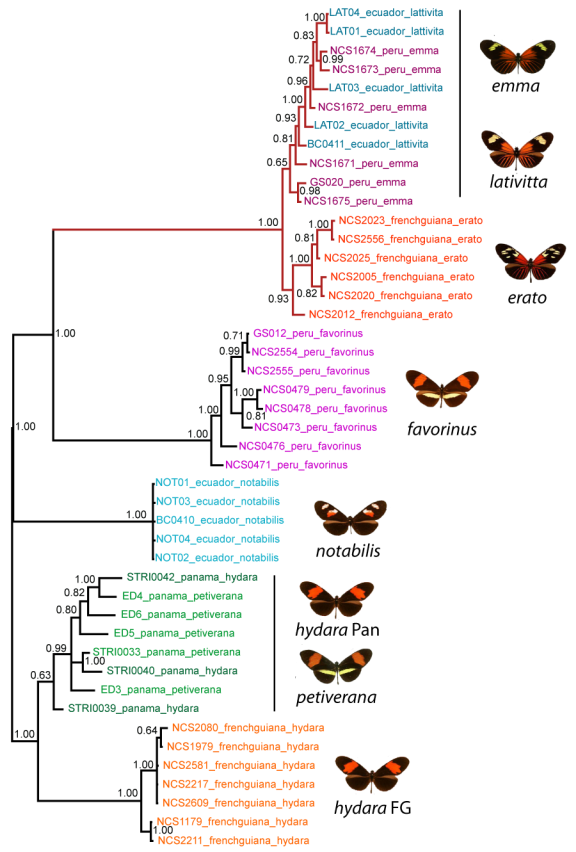

B) Color-unlinked BACs

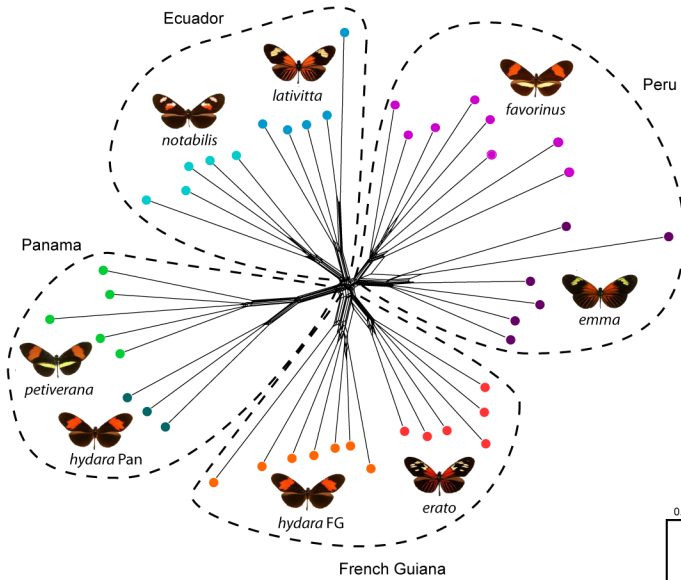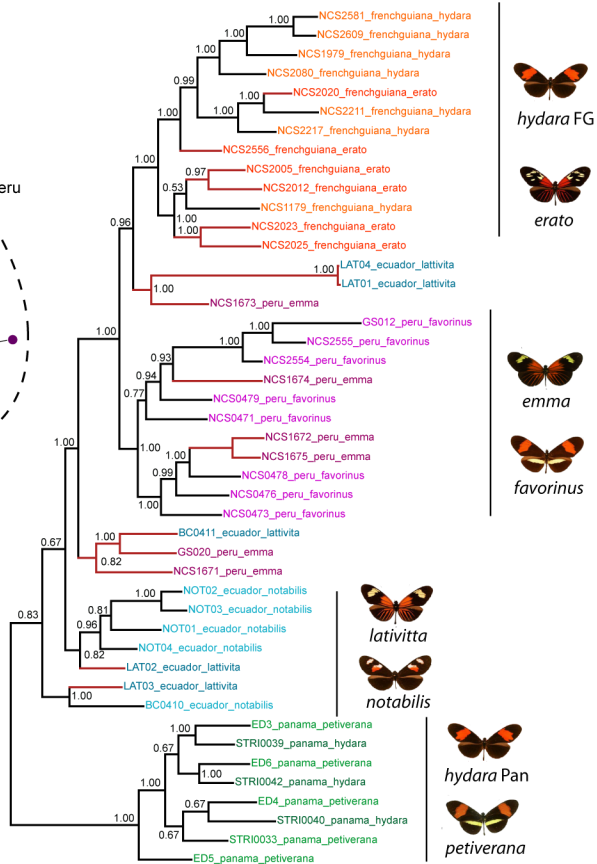

Supplement: Supplemental_FigS5.pdf [file Supplemental_FigS5.pdf]
