# Supplementary material for: Genomic architecture of adaptive color pattern divergence and convergence in Heliconius butterflies
Source: HighWire-hosted journal article supplement (doi:10.1101/gr.150615.112), 2013-05-14
Supplement: Supplemental_Legends.docx [file Supplemental_Legends.docx]

**Supplemental Figure S1: Comparison of population differentiation, association, and gene synteny between *H. erato* and *H. melpomene* in the Peruvian hybrid zone.**

The top and bottom panels show sliding window (15 kb window size, 5 kb step size) population differentiation and SNPs perfectly associated with phenotype between postman and rayed phenotypes within *H. erato* and *H. melpomene*, respectively, for the Peruvian hybrid zone (nerato_postman=8, nerato_rayed=6, nmelpomene_postman=4, nmelpomene_rayed=4) requiring a minimum of 75% of individuals genotyped for each phenotype at each position and data for at least 20% of positions in the window. The grey shaded regions highlight the 65 kb region of peak divergence across multiple *H. erato* hybrid zones (Figure 2). Baseline population differentiations of erato=0.03 and melpomene=0.02 were calculated from genomic intervals unlinked to color pattern. The middle panel shows gene synteny between the *H. erato* *D* interval genes (top row) and their orthologous *H. melpomene* genes (bottom row), with selected genes highlighted in red. The larger boxes represent coding exons and the narrower boxes represent introns. The synteny lines connect the beginnings and endings of orthologous genes.

**Supplemental Figure S2: Annotation and analyses across the peak of divergence**

Analysis across the region of peak divergence showing regions of high conservation between *H. erato* and *H. melpomene* (top panel, mVista alignment with 500 bp windows, red indicates >90% sequence identity), candidate SNPs perfectly associated with phenotype (“fixed SNPs”), probable repetitive regions based on hypercoverage of whole genome alignments (“hypercoverage”), regions with substantial missing data (“missing data”, less than 20% of the positions in a 15 kb window have at least 75% of samples genotyped), and the number of predicted transcription factor (TF) binding sites (bottom panel, non-overlapping 100 bp windows across the 520-570 kb region).

**Supplemental Figure S3: Decay of LD in *H. erato* across the 65 kb peak and color unlinked regions.**

Correlation between SNPs as a function of distance between SNPs (colored symbols—65 kb peak of divergence; grey symbols—color unlinked regions). SNPs were binned into 100 bp windows based on the distance between SNPs. For each bin, the average correlation was calculated from all pairwise biallelic SNPs with at least 75% of individuals genotyped in the hybrid zone.

**Supplemental Figure S4: *H. erato* genomic differentiation and association by hybrid zone.**

Each panel indicates sliding window (15 kb window size, 5 kb step size) population differentiation and association values between two color pattern races for individuals from a single *H. erato* hybrid zone (nperu_postman=8, nperu_rayed=6, necuador_postman=5, necuador_rayed=5, nfrenchguiana_postman=7, nfrenchguiana_rayed=6, npanama_postman1=5, npanama_postman2=3), requiring a minimum of 75% of individuals genotyped for each phenotype at each position and data for at least 20% of positions in the window. The green shaded area indicates the region of peak divergence across the *H. erato* hybrid zones combined (Figure 2). Baseline population differentiations of peru=0.03, ecuador=0.05, frenchguiana=0.02, and panama=0.01 were calculated from BACs unlinked to color pattern. The races from the hybrid zones in French Guiana, Ecuador, and Peru show phenotypic variation in the red color pattern elements, while the races from the Panamanian hybrid zone do not.

**Supplemental Figure S5: Phylogenetic relationships in the 65 kb peak of divergence and color unlinked regions.**

Phylogenetic relationships among individuals from A) the region of strongest association in the *D* interval (515-580 kb) and B) from BACs unlinked to color pattern. Trees were constructed from datasets filtered to remove SNPs with more than 75% missing data and include neighbor-net phylogenetic networks (left) and Bayesian tree topologies (right). Terminal nodes in the networks and sample names in the Bayesian trees are color-coded respective to race. Dashed lines in the networks indicate rayed vs. non-rayed patterns for the *D* interval and hybrid zones for the unlinked data. Red branches in the Bayesian tree indicate rayed lineages. Specimen names follow a naming system including voucher number, hybrid zone, and race. Nodal values are posterior probabilities of clade support. Unrooted Bayesian trees were arbitrarily rooted for presentation.

**Supplemental Figure S6: Phylogeny of *H. erato* and *H. melpomene* across the 65 kb peak of divergence.**

Bayesian phylogeny using reliably aligned SNPs across the 65 kb region of highest divergence and association. Lineages with rayed patterns are colored in red. Posterior probability support values are displayed for major lineages. Degree of support for all lineages is indicated by branch thickness, with thicker branches for nodes supported by a posterior probability >90.
